# Supplementary material
Source: PubMed Central journal article supplement (PMC2875826)
Supplement: en.2009-1446_1.pdf [file en.2009-1446_1.pdf]

Supplemental Table 1.

Sequences of primers used for quantitative real time PCR

| <b>Gene</b>    | <b>Accession</b> | <b>Forward Primer</b>   | <b>Reverse Primer</b>   |
|----------------|------------------|-------------------------|-------------------------|
| <i>Lhcgr</i>   | NM_013582        | CACCATACCAGGGAACGCTT    | CAGCGAGATTAGCGTCGTCC    |
| <i>Timp1</i>   | NM_011593        | GCAACTCGGACCTGGTCATAAG  | TGTAGGCGTACCGGATATCTGC  |
| <i>Ptgs2</i>   | NM_011198        | CTCAATGAGTACCGCAAACGCT  | TGCAGCCATTTCTTCTCTCC    |
| <i>Cyp19</i>   | NM_007810        | TGATCATGGGCCTCCTCCTTCTC | CCCAGACAGTAGCCAGGACCT   |
| <i>Cyp17a1</i> | NM_007809        | GATCGGTTTATGCCTGAGCG    | TCCGAAGGGCAAATAACTGG    |
| <i>Esr1</i>    | NM_007956        | AAGCTGGCCTGACTCTGCAG    | TGTTGTAGAGATGCTCCATGC   |
| <i>rpl7</i>    | NM_011291        | AGCTGGCCTTTGTCATCAGAA   | GACGAAGGAGCTGCAGAACCT   |
| <i>Areg</i>    | NM_009704        | GCGCGCTCAGTGCTGTT       | GGGTCATTGAGCTCCAAAGC    |
| <i>Ereg</i>    | NM_007950        | CTGCCTCTTGGGTCTTGACG    | GCGGTACAGTTATCCTCGGATTC |
